# Supplementary material for: Congenital Myopathy as a Phenotypic Expression of CACNA1S Gene Mutation: Case Report and Systematic Review of the Literature
Source: MDPI journal article supplement (doi:10.3390/genes14071363), 2023-06-28
Supplement: s1 [file s1]

|                       | Case | Mutations                    | Position in CACNA1S gene              | Position in Cav 1.1                | Phenotype | Varsome                | CADD Score | Clin Var               |
|-----------------------|------|------------------------------|---------------------------------------|------------------------------------|-----------|------------------------|------------|------------------------|
| Our case              | 1    | c.1394-2A>G                  | intron 10 of 43 position 5056 of 5057 | T: Helical, S2 of II domain        | Mild      | Likely Pathogenetic    | 34         | -                      |
|                       |      | c.1724T>C, p.Leu575Pro       | exon 12 of 44 position 105 of 208     | T: Helical, S5 of II domain        |           | Uncertain Significance | 31         | Uncertain Significance |
| Schartner et al.      | 2    | c.1189_1190del, p.Ser397Pro  | exon 9 of 44 position 39-40 of 82     | C: between I and II domains        | Mild      | Pathogenetic           | 25.1       | Pathogenetic           |
|                       |      | c.4967del, p.Leu1656Arg      | exon 40 of 44 position 170 of 251     | C: afte IV domain                  |           | Pathogenetic           | 23.5       | Pathogenetic           |
|                       | 3    | c.4453C>T, p.Gln1485*        | exon 37 of 44 position 12 of 102      | C: afte IV domain                  | Mild      | Uncertain Significance | 20.5       | Pathogenetic           |
|                       |      | c.4967del, p.Leu1656Arg      | exon 40 of 44 position 170 of 251     | C: afte IV domain                  |           | Pathogenetic           | 23.5       | Pathogenetic           |
|                       | 4    | c.825C>A, p.Phe275Leu        | exon 6 of 44 position 131 of 206      | E: between S5 and S6 of I domain   | Mild      | Uncertain Significance | 20.5       | Pathogenetic           |
|                       |      | c.2371delC, p.Leu791Cys      | exon 18 of 44 position 11 of 130      | C: between II and III domains      |           | Pathogenetic           | -          | Pathogenetic           |
|                       | 5    | c.825C>A, p.Phe275Leu        | exon 6 of 44 position 131 of 206      | E: between S5 and S6 of I domain   | Moderate  | Uncertain Significance | 20.5       | Pathogenetic           |
|                       |      | c.2371delC, p.Leu791Cys      | exon 18 of 44 position 11 of 130      | C: between II and III domains      |           | Pathogenetic           | 19.27      | Pathogenetic           |
|                       | 6    | c.298G>T, p.Glu100Lys        | exon 3 of 44 position 40 of 140       | T: Helical, S2 of I domain         | Severe    | Likely Pathogenetic    | 39         | -                      |
|                       |      | c.3795G>T, p.Gln1265His      | exon 30 of 44 position 129 of 129     | C: between S4 and S5 of IV domain  |           | Pathogenetic           | 36         | Likely Pathogenetic    |
|                       | 7    | c.2225C>A, p.Pro742Gln       | exon 16 of 44 position 68 of 70       | C: between II and III domains      | Mild      | Uncertain Significance | 33         | Pathogenetic           |
|                       | 8    | c.2225C>A, p.Pro742Gln       | exon 16 of 44 position 68 of 70       | C: between II and III domains      | Mild      | Uncertain Significance | 33         | Pathogenetic           |
|                       | 9    | c.2225C>A, p.Pro742Gln       | exon 16 of 44 position 68 of 70       | C: between II and III domains      | Mild      | Uncertain Significance | 33         | Pathogenetic           |
|                       | 10   | c.2224C>T, p.Pro742Ser       | exon 16 of 44 position 67 of 70       | C: between II and III domains      | Severe    | Uncertain Significance | 24.4       | Pathogenetic           |
|                       | 11   | c.4099C>G, p.Leu1367Val      | exon 33 of 44 position 146 of 160     | T: Helical, S6 of IV domain        | Mild      | Uncertain Significance | 27.8       | Uncertain Significance |
|                       | 12   | c.4099C>G, p.Leu1367Val      | exon 33 of 44 position 146 of 160     | T: Helical, S6 of IV domain        | Mild      | Uncertain Significance | 27.8       | Uncertain Significance |
| Yis et al.            | 13   | c.2366G>A, p.Arg789His *homo | exon 18 of 44 position 6 of 130       | C: between II and III domains      | Severe    | Uncertain Significance | 28         | Uncertain Significance |
|                       | 14   | c.2366G>A, p.Arg789His *homo | exon 18 of 44 position 6 of 130       | C: between II and III domains      | Severe    | Uncertain Significance | 28         | Uncertain Significance |
|                       | 15   | c.2366G>A, p.Arg789His *homo | exon 18 of 44 position 6 of 130       | C: between II and III domains      | Severe    | Uncertain Significance | 28         | Uncertain Significance |
| Morales et al.        | 16   | c.2970G>A, p.Trp990*         | exon 24 of 44 position 64 of 147      | E: between S5 and S6 of III domain | Moderate  | Pathogenetic           | 48         | Pathogenetic           |
|                       |      | c.5104C>T, p.Arg1702*        | exon 41 of 44 position 56 of 86       | C: afte IV domain                  |           | Pathogenetic           | 36         | Conflicting            |
|                       | 17   | c.2447T>G, p.Leu816Arg       | exon 18 of 44 position 87 of 130      | T: Helical, S1 of III domain       | Moderate  | Uncertain Significance | 26.5       | -                      |
| Hunter et al.         | 18   | c.4947delA, p.Gln1649Gln     | exon 40 of 44 position 150 of 251     | C: afte IV domain                  | Moderate  | Pathogenetic           | -          | Pathogenetic           |
|                       |      | c.3795G>T, p.Gln1265His      | exon 30 of 44 position 129 of 129     | C: between S4 and S5 of IV domain  |           | Pathogenetic           | 36         | Likely Pathogenetic    |
| Francois-Heude et al. | 19   | c.2618del, p.Leu873Arg       | exon 20 of 44 position 68 of 107      | T: Helical, S3 of III domain       | Moderate  | Likely Pathogenetic    | 28.9       | -                      |
|                       |      | c.5104C>T, p.Arg1702*        | exon 41 of 44 position 56 of 86       | C: afte IV domain                  |           | Pathogenetic           | 36         | Conflicting            |
| Mauri et al.          | 20   | c.3364 T > C, p.Tyr1122His   | exon 26 of 44 position 109 of 159     | T: Helical, S1 of IV domain        | Mild      | Uncertain Significance | 29.7       | -                      |
| Ravenscroft et al.    | 21   | c.665T>A, p.Met222Lys        | exon 5 of 44 position 124 of 153      | E: between S5 and S6 of I domain   | Severe    | Uncertain Significance | 27.9       | Uncertain Significance |
|                       |      | c.2365C>T, p.Arg789Cys       | exon 18 of 44 position 5 of 130       | C: between II and III domains      |           | Uncertain Significance | 31         | Uncertain Significance |
|                       | 22   | c.665T>A, p.Met222Lys        | exon 5 of 44 position 124 of 153      | E: between S5 and S6 of I domain   | Severe    | Uncertain Significance | 27.9       | Uncertain Significance |
|                       |      | c.2365C>T, p.Arg789Cys       | exon 18 of 44 position 5 of 130       | C: between II and III domains      |           | Uncertain Significance | 31         | Uncertain Significance |
| Grunseich C. et al.   | 23   | c.2725A>G, p.Asn909Ser       | exon 21 of 44 position 68 of 88       | T: Helical, S4 of III domain       | Mild      | Uncertain Significance | 28.5       | -                      |
| Kausthubham et al.    | 24   | c.4316G>T, p.Cys1439Phe      | exon 35 of 44 position 75 of 97       | C: afte IV domain                  | Severe    | Uncertain Significance | 27.4       | Uncertain Significance |

**Table S1:** Position in CACNA1S gene and in Cav 1.1, Phenotype (mild, moderate, severe), Varsome grade (<https://varsome.com/>) [26], CADD score (Combined Annotation Dependent

Depletion score, <https://cadd.gs.washington.edu/snv>) [29] and Clin Var index (<https://www.ncbi.nlm.nih.gov/clinvar/>) of variants in *CACNA1S* gene individuated in 24 patients.
